# Supplementary material for: In Vitro Tracking of Human Umbilical Vein Endothelial Cells Using Ultra-Sensitive Quantum Dot-Embedded Silica Nanoparticles
Source: MDPI journal article supplement (doi:10.3390/ijms24065794), 2023-03-17
Supplement: s1 [file s1]

[Supplementary Material]

# **In Vitro Tracking of Human Umbilical Vein Endothelial Cells Using Ultra-Sensitive Quantum Dot- Embedded Silica Nanoparticles**

Jaehi Kim <sup>1†</sup>, Sunray Lee <sup>2†</sup>, Yeon Kyung Lee <sup>2</sup>, Bomi Seong <sup>1</sup>, Hyung-Mo Kim <sup>1</sup>, San Kyeong <sup>3</sup>,  
Wooyeon Kim <sup>1</sup>, Kyeongmin Ham <sup>1</sup>, Xuan-Hung Pham <sup>1</sup>, Eunil Hahm <sup>1</sup>, Ji Yeon Mun <sup>2</sup>, Mukhtar  
Anthony Safaa <sup>2</sup>, Yoon-Sik Lee <sup>3</sup>, Bong-Hyun Jun <sup>1,\*</sup> and Hyun-Sook Park <sup>2,\*</sup>

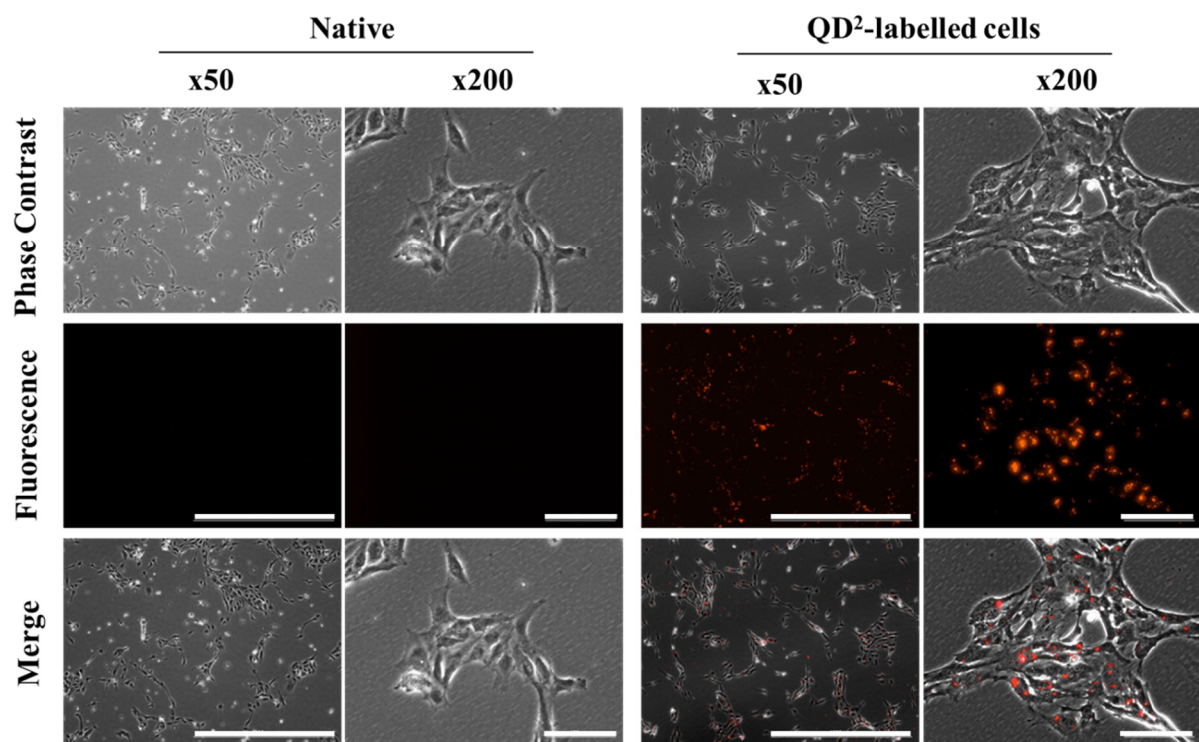

**Figure S1.** Phase-contrast images of HUVEC without and with QD<sup>2</sup> label (Scale bar size; 50X=1000  $\mu$ m and 200X=100  $\mu$ m).
